# Supplementary material
Source: PubMed Central journal article supplement (PMC2840341)
Supplement: 0906067107_pnas.200906067SI.pdf [file 0906067107_pnas.200906067SI.pdf]

# Supporting Information

Sotelo et al. 10.1073/pnas.0906067107

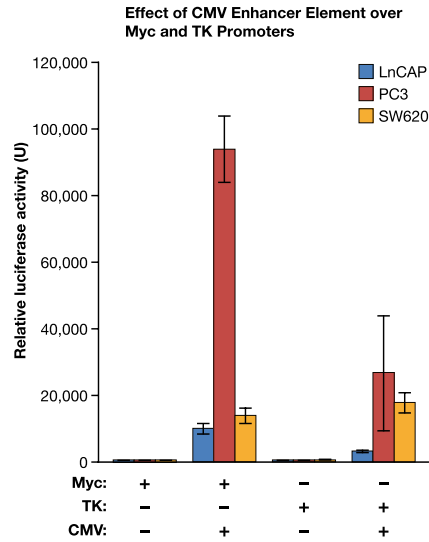

**Fig. S1.** Effect of CMV enhancer element over Myc and TK promoters. The CMV enhancer was cloned in front of a Myc promoter-driven or TK promoter-driven luciferase-GFP reporter. Luciferase activity was recorded in prostate cell lines LnCAP and PC3 as well as colorectal cell line SW620. Enhancer reporter plasmids were cotransfected into cell lines as described in *Materials and Methods*. Luciferase activity was measured 24 h after transfection by using the Dual-Glo Luciferase assay system.

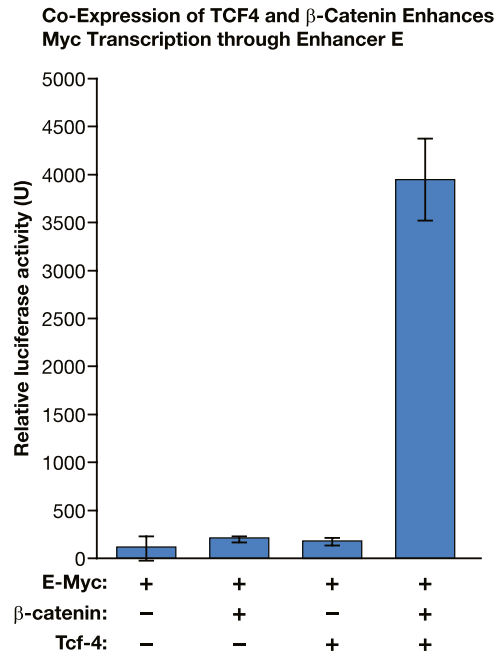

**Fig. S2.** Enhancer E interacts with Tcf-4 in vivo.  $\beta$ -Catenin/Tcf-4 can stimulate enhancer E activity in the luciferase reporter assay. Luciferase activity of Enhancer E-Myc-luciferase constructs in prostate cell line LnCAP with (+)/without (-)  $\beta$ -catenin and/or Tcf-4.

## Other Supporting Information Files

[SI Text \(DOC\)](#)

[Dataset S1 \(XLS\)](#)

[Dataset S2 \(XLS\)](#)

[Dataset S3 \(XLS\)](#)

[Dataset S4 \(XLS\)](#)
